# Supplementary figures and images for: Study protocol for a randomised controlled trial comparing the efficiency of two provider-endorsed manual paediatric fluid resuscitation techniques
Source: HighWire-hosted journal article supplement (doi:10.1136/bmjopen-2013-002754), 2013-01-01

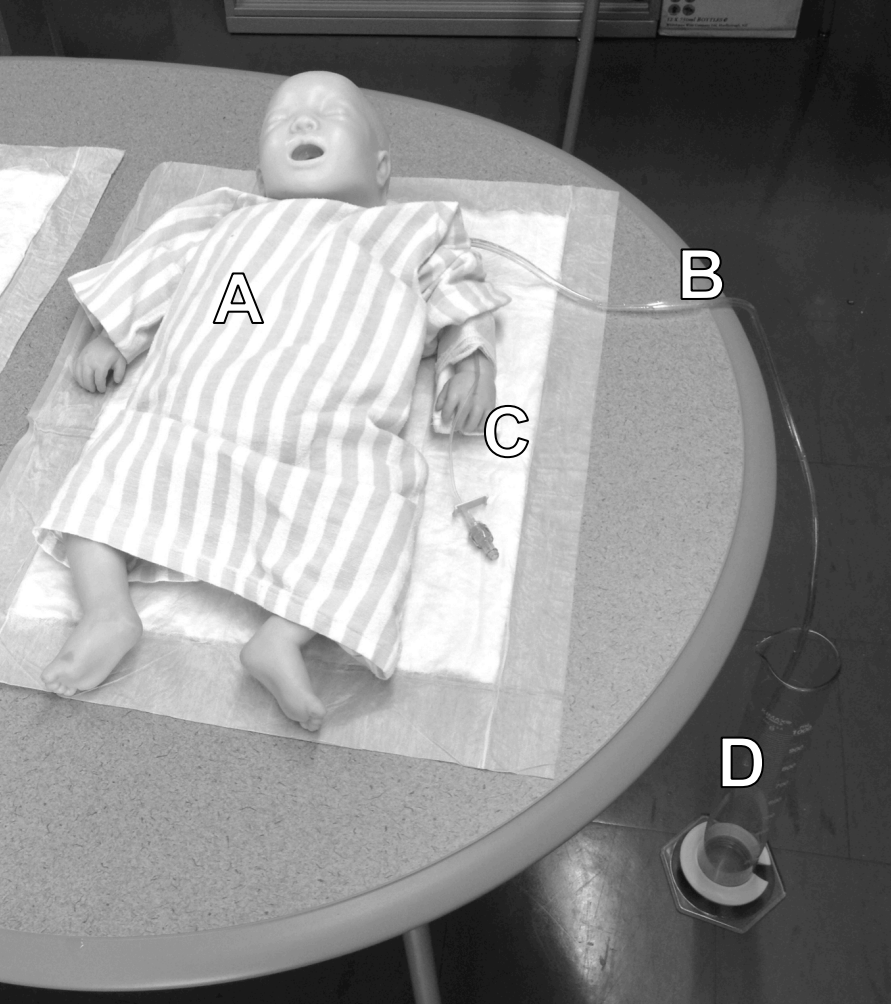

A

B

C

D

Supplement: bmjopen-2013-002754supp_appendix2.pdf [file bmjopen-2013-002754supp_appendix2.pdf]
